# Supplementary material
Source: publisher figshare collection journal article supplement (https://asha.figshare.com/articles/dataset/_/20520774)
Supplement: Supplementary file 1 [file 1]

**Supplemental Material S3.** Frequency table for the number and proportion of each fine-grained spelling error type across grades in text production.

Text production - Contingency table for the proportion for each fine grained type of error per year group

Cell Contents

|                         |
|-------------------------|
| Count                   |
| Expected values         |
| Chi-square contribution |
| Row Percent             |
| Column Percent          |
| Total Percent           |
| Std Residual            |

Total Observations in Table: 2117

| SpellErr194\$ErrType | SpellErr194\$class_num |         |         |         |         | Row Total |
|----------------------|------------------------|---------|---------|---------|---------|-----------|
|                      | 1                      | 2       | 3       | 4       | 5       |           |
| MOR-ACCORD           | 20                     | 49      | 26      | 68      | 70      | 233       |
|                      | 42.043                 | 79.354  | 28.396  | 42.043  | 41.163  |           |
|                      | 11.557                 | 11.611  | 0.202   | 16.025  | 20.202  |           |
|                      | 8.584%                 | 21.030% | 11.159% | 29.185% | 30.043% | 11.006%   |
|                      | 5.236%                 | 6.796%  | 10.078% | 17.801% | 18.717% |           |
|                      | 0.945%                 | 2.315%  | 1.228%  | 3.212%  | 3.307%  |           |
|                      | -3.400                 | -3.407  | -0.450  | 4.003   | 4.495   |           |
| MOR-COART            | 70                     | 95      | 27      | 30      | 18      | 240       |
|                      | 43.307                 | 81.738  | 29.249  | 43.307  | 42.400  |           |
|                      | 16.453                 | 2.152   | 0.173   | 4.089   | 14.041  |           |
|                      | 29.167%                | 39.583% | 11.250% | 12.500% | 7.500%  | 11.337%   |
|                      | 18.325%                | 13.176% | 10.465% | 7.853%  | 4.813%  |           |
|                      | 3.307%                 | 4.487%  | 1.275%  | 1.417%  | 0.850%  |           |
|                      | 4.056                  | 1.467   | -0.416  | -2.022  | -3.747  |           |
| MOR-DER              | 6                      | 9       | 5       | 6       | 4       | 30        |

|            |                                                                |                                                                   |                                                                |                                                                |                                                                  |                |  |
|------------|----------------------------------------------------------------|-------------------------------------------------------------------|----------------------------------------------------------------|----------------------------------------------------------------|------------------------------------------------------------------|----------------|--|
|            | 5.413<br>0.064<br>20.000%<br>1.571%<br>0.283%<br>0.252         | 10.217<br>0.145<br>30.000%<br>1.248%<br>0.425%<br>-0.381          | 3.656<br>0.494<br>16.667%<br>1.938%<br>0.236%<br>0.703         | 5.413<br>0.064<br>20.000%<br>1.571%<br>0.283%<br>0.252         | 5.300<br>0.319<br>13.333%<br>1.070%<br>0.189%<br>-0.565          | 1.417%         |  |
| MOR-HOM    | 20<br>37.893<br>8.449<br>9.524%<br>5.236%<br>0.945%<br>-2.907  | 68<br>71.521<br>0.173<br>32.381%<br>9.431%<br>3.212%<br>-0.416    | 33<br>25.593<br>2.144<br>15.714%<br>12.791%<br>1.559%<br>1.464 | 44<br>37.893<br>0.984<br>20.952%<br>11.518%<br>2.078%<br>0.992 | 45<br>37.100<br>1.682<br>21.429%<br>12.032%<br>2.126%<br>1.297   | 210<br>9.920%  |  |
| MOR-VERB   | 35<br>75.606<br>21.808<br>8.353%<br>9.162%<br>1.653%<br>-4.670 | 109<br>142.701<br>7.959<br>26.014%<br>15.118%<br>5.149%<br>-2.821 | 64<br>51.064<br>3.277<br>15.274%<br>24.806%<br>3.023%<br>1.810 | 93<br>75.606<br>4.002<br>22.196%<br>24.346%<br>4.393%<br>2.000 | 118<br>74.023<br>26.127<br>28.162%<br>31.551%<br>5.574%<br>5.111 | 419<br>19.792% |  |
| NC         | 1<br>0.361<br>1.132<br>50.000%<br>0.262%<br>0.047%<br>1.064    | 1<br>0.681<br>0.149<br>50.000%<br>0.139%<br>0.047%<br>0.386       | 0<br>0.244<br>0.244<br>0.000%<br>0.000%<br>0.000%<br>-0.494    | 0<br>0.361<br>0.361<br>0.000%<br>0.000%<br>0.000%<br>-0.601    | 0<br>0.353<br>0.353<br>0.000%<br>0.000%<br>0.000%<br>-0.594      | 2<br>0.094%    |  |
| ORTH-EXCPT | 3<br>5.052<br>0.834<br>10.714%<br>0.785%<br>0.142%<br>-0.913   | 8<br>9.536<br>0.247<br>28.571%<br>1.110%<br>0.378%<br>-0.497      | 8<br>3.412<br>6.168<br>28.571%<br>3.101%<br>0.378%<br>2.483    | 6<br>5.052<br>0.178<br>21.429%<br>1.571%<br>0.283%<br>0.422    | 3<br>4.947<br>0.766<br>10.714%<br>0.802%<br>0.142%<br>-0.875     | 28<br>1.323%   |  |
| ORTH-MUET  | 49<br>42.404                                                   | 101<br>80.035                                                     | 23<br>28.640                                                   | 25<br>42.404                                                   | 37<br>41.516                                                     | 235            |  |

|               |                                                                 |                                                                 |                                                                |                                                                |                                                                |                        |  |
|---------------|-----------------------------------------------------------------|-----------------------------------------------------------------|----------------------------------------------------------------|----------------------------------------------------------------|----------------------------------------------------------------|------------------------|--|
|               | 1.026<br>20.851%<br>12.827%<br>2.315%<br>1.013                  | 5.491<br>42.979%<br>14.008%<br>4.771%<br>2.343                  | 1.111<br>9.787%<br>8.915%<br>1.086%<br>-1.054                  | 7.143<br>10.638%<br>6.545%<br>1.181%<br>-2.673                 | 0.491<br>15.745%<br>9.893%<br>1.748%<br>-0.701                 | 11.101%                |  |
| ORTH-OA       | 14<br>14.075<br>0.000<br>17.949%<br>3.665%<br>0.661%<br>-0.020  | 28<br>26.565<br>0.078<br>35.897%<br>3.883%<br>1.323%<br>0.278   | 10<br>9.506<br>0.026<br>12.821%<br>3.876%<br>0.472%<br>0.160   | 15<br>14.075<br>0.061<br>19.231%<br>3.927%<br>0.709%<br>0.247  | 11<br>13.780<br>0.561<br>14.103%<br>2.941%<br>0.520%<br>-0.749 | 78<br><br><br>3.684%   |  |
| ORTH-SIGNE    | 22<br>27.608<br>1.139<br>14.379%<br>5.759%<br>1.039%<br>-1.067  | 50<br>52.108<br>0.085<br>32.680%<br>6.935%<br>2.362%<br>-0.292  | 12<br>18.646<br>2.369<br>7.843%<br>4.651%<br>0.567%<br>-1.539  | 39<br>27.608<br>4.701<br>25.490%<br>10.209%<br>1.842%<br>2.168 | 30<br>27.030<br>0.326<br>19.608%<br>8.021%<br>1.417%<br>0.571  | 153<br><br><br>7.227%  |  |
| ORTH-SUB      | 76<br>47.998<br>16.336<br>28.571%<br>19.895%<br>3.590%<br>4.042 | 111<br>90.593<br>4.597<br>41.729%<br>15.395%<br>5.243%<br>2.144 | 33<br>32.418<br>0.010<br>12.406%<br>12.791%<br>1.559%<br>0.102 | 24<br>47.998<br>11.999<br>9.023%<br>6.283%<br>1.134%<br>-3.464 | 22<br>46.993<br>13.292<br>8.271%<br>5.882%<br>1.039%<br>-3.646 | 266<br><br><br>12.565% |  |
| PHON-CLUSTER  | 2<br>0.361<br>7.445<br>100.000%<br>0.524%<br>0.094%<br>2.728    | 0<br>0.681<br>0.681<br>0.000%<br>0.000%<br>0.000%<br>-0.825     | 0<br>0.244<br>0.244<br>0.000%<br>0.000%<br>0.000%<br>-0.494    | 0<br>0.361<br>0.361<br>0.000%<br>0.000%<br>0.000%<br>-0.601    | 0<br>0.353<br>0.353<br>0.000%<br>0.000%<br>0.000%<br>-0.594    | 2<br><br><br>0.094%    |  |
| PHON-GRAPH-CO | 25<br>14.436<br>7.731                                           | 35<br>27.246<br>2.207                                           | 6<br>9.750<br>1.442                                            | 9<br>14.436<br>2.047                                           | 5<br>14.133<br>5.902                                           | 80                     |  |

|              |         |         |         |         |         |        |
|--------------|---------|---------|---------|---------|---------|--------|
|              | 31.250% | 43.750% | 7.500%  | 11.250% | 6.250%  | 3.779% |
|              | 6.545%  | 4.854%  | 2.326%  | 2.356%  | 1.337%  |        |
|              | 1.181%  | 1.653%  | 0.283%  | 0.425%  | 0.236%  |        |
|              | 2.781   | 1.485   | -1.201  | -1.431  | -2.429  |        |
| PHON-OAI     | 23      | 27      | 6       | 9       | 5       | 70     |
|              | 12.631  | 23.840  | 8.531   | 12.631  | 12.367  |        |
|              | 8.512   | 0.419   | 0.751   | 1.044   | 4.388   |        |
|              | 32.857% | 38.571% | 8.571%  | 12.857% | 7.143%  | 3.307% |
|              | 6.021%  | 3.745%  | 2.326%  | 2.356%  | 1.337%  |        |
|              | 1.086%  | 1.275%  | 0.283%  | 0.425%  | 0.236%  |        |
|              | 2.918   | 0.647   | -0.867  | -1.022  | -2.095  |        |
| PHON-SUB     | 16      | 30      | 5       | 14      | 6       | 71     |
|              | 12.812  | 24.181  | 8.653   | 12.812  | 12.543  |        |
|              | 0.794   | 1.400   | 1.542   | 0.110   | 3.413   |        |
|              | 22.535% | 42.254% | 7.042%  | 19.718% | 8.451%  | 3.354% |
|              | 4.188%  | 4.161%  | 1.938%  | 3.665%  | 1.604%  |        |
|              | 0.756%  | 1.417%  | 0.236%  | 0.661%  | 0.283%  |        |
|              | 0.891   | 1.183   | -1.242  | 0.332   | -1.848  |        |
| Column Total | 382     | 721     | 258     | 382     | 374     | 2117   |
|              | 18.044% | 34.058% | 12.187% | 18.044% | 17.667% |        |

## Statistics for All Table Factors

### Pearson's Chi-squared test

Chi<sup>2</sup> = 306.257      d.f. = 56      p = 3.468908e-36
