# Supplementary material
Source: publisher figshare collection journal article supplement (https://asha.figshare.com/articles/dataset/_/20520774)
Supplement: Supplementary file 2 [file 1]

**Supplemental Material S1.** Characteristics of the 17 words used from the WIAT dictation task.

| Target       | Orthographic characteristics                                                                           |
|--------------|--------------------------------------------------------------------------------------------------------|
| te           | Frequent and phonologically-transparent word                                                           |
| il           | Frequent and phonologically-transparent word                                                           |
| gros         | Frequent – consonant cluster /gr/ - final silent letter <i>s</i>                                       |
| lait         | Frequent – final silent letter <i>t</i> - Complex grapheme <i>ai</i>                                   |
| main         | Frequent – Complex grapheme <i>in/im/ain/aim</i>                                                       |
| tulipe       | Less frequent - Phonologically-transparent word                                                        |
| sous         | Frequent – final silent letter <i>s</i>                                                                |
| mer          | Homophones (e.g., mère or maire)                                                                       |
| suis         | Complex graphemes <i>ui</i> - Verb ending: final silent letter <i>s</i>                                |
| moustache    | Complex graphemes <i>ou</i> , <i>ch</i>                                                                |
| droite       | Consonant cluster /dr/ - Complex grapheme <i>oi</i> - Feminine marking <i>e</i>                        |
| aujourd'hui  | Complex graphemes <i>au</i> , <i>ou</i> , <i>ui</i> - silent letter <i>h</i> - Parsing with apostrophe |
| plafond      | Consonant cluster /pl/ - Complex grapheme <i>on</i> - Silent letter <i>d</i>                           |
| commencement | Letter doubling – derived word with suffix -ement                                                      |
| désigne      | Diacritic (accent), complex grapheme <i>gn</i> – verb ending <i>e</i>                                  |
| grimpa       | Consonant cluster /gr/ - contextual grapheme <i>in/im/ain/aim</i> – verb ending <i>a</i>               |
| accepte      | Consonant cluster /ks/ – verb ending <i>e</i>                                                          |
