# Supplementary material
Source: publisher figshare collection journal article supplement (https://asha.figshare.com/articles/dataset/_/20520774)
Supplement: Supplementary file 3 [file 1]

**Supplemental Material S4.** Frequency table for the number and proportion of each fine-grained spelling error type across grades in dictation.

WIAT17 - Contingency table for the proportion for each fine grained type of error per year group

| Cell Contents                     |                            |         |         |         |        |           |
|-----------------------------------|----------------------------|---------|---------|---------|--------|-----------|
|                                   | Count                      |         |         |         |        |           |
|                                   | Expected values            |         |         |         |        |           |
|                                   | Chi-square contribution    |         |         |         |        |           |
|                                   | Row Percent                |         |         |         |        |           |
|                                   | Column Percent             |         |         |         |        |           |
|                                   | Total Percent              |         |         |         |        |           |
|                                   | Std Residual               |         |         |         |        |           |
| Total Observations in Table: 1646 |                            |         |         |         |        |           |
| SpellErr17\$ErrType               | SpellErr17\$Class_num<br>1 | 2       | 3       | 4       | 5      | Row Total |
| MORACCORD                         | 8                          | 14      | 6       | 9       | 4      | 41        |
|                                   | 14.522                     | 17.212  | 3.163   | 3.786   | 2.317  |           |
|                                   | 2.929                      | 0.599   | 2.543   | 7.180   | 1.223  |           |
|                                   | 19.512%                    | 34.146% | 14.634% | 21.951% | 9.756% | 2.491%    |
|                                   | 1.372%                     | 2.026%  | 4.724%  | 5.921%  | 4.301% |           |
|                                   | 0.486%                     | 0.851%  | 0.365%  | 0.547%  | 0.243% |           |
|                                   | -1.711                     | -0.774  | 1.595   | 2.680   | 1.106  |           |
| MORCOART                          | 32                         | 50      | 0       | 5       | 1      | 88        |
|                                   | 31.169                     | 36.943  | 6.790   | 8.126   | 4.972  |           |
|                                   | 0.022                      | 4.615   | 6.790   | 1.203   | 3.173  |           |
|                                   | 36.364%                    | 56.818% | 0.000%  | 5.682%  | 1.136% | 5.346%    |
|                                   | 5.489%                     | 7.236%  | 0.000%  | 3.289%  | 1.075% |           |
|                                   | 1.944%                     | 3.038%  | 0.000%  | 0.304%  | 0.061% |           |
|                                   | 0.149                      | 2.148   | -2.606  | -1.097  | -1.781 |           |
| MORDER                            | 24                         | 32      | 6       | 3       | 4      | 69        |
|                                   | 24.439                     | 28.967  | 5.324   | 6.372   | 3.899  |           |

|          |                                                                  |                                                                   |                                                                |                                                               |                                                                |                        |  |
|----------|------------------------------------------------------------------|-------------------------------------------------------------------|----------------------------------------------------------------|---------------------------------------------------------------|----------------------------------------------------------------|------------------------|--|
|          | 0.008<br>34.783%<br>4.117%<br>1.458%<br>-0.089                   | 0.318<br>46.377%<br>4.631%<br>1.944%<br>0.564                     | 0.086<br>8.696%<br>4.724%<br>0.365%<br>0.293                   | 1.784<br>4.348%<br>1.974%<br>0.182%<br>-1.336                 | 0.003<br>5.797%<br>4.301%<br>0.243%<br>0.051                   | 4.192%                 |  |
| MORHOM   | 8<br>8.501<br>0.029<br>33.333%<br>1.372%<br>0.486%<br>-0.172     | 12<br>10.075<br>0.368<br>50.000%<br>1.737%<br>0.729%<br>0.606     | 0<br>1.852<br>1.852<br>0.000%<br>0.000%<br>0.000%<br>-1.361    | 3<br>2.216<br>0.277<br>12.500%<br>1.974%<br>0.182%<br>0.526   | 1<br>1.356<br>0.093<br>4.167%<br>1.075%<br>0.061%<br>-0.306    | 24<br><br><br>1.458%   |  |
| MORVERB  | 26<br>24.439<br>0.100<br>37.681%<br>4.460%<br>1.580%<br>0.316    | 18<br>28.967<br>4.152<br>26.087%<br>2.605%<br>1.094%<br>-2.038    | 4<br>5.324<br>0.329<br>5.797%<br>3.150%<br>0.243%<br>-0.574    | 11<br>6.372<br>3.362<br>15.942%<br>7.237%<br>0.668%<br>1.833  | 10<br>3.899<br>9.549<br>14.493%<br>10.753%<br>0.608%<br>3.090  | 69<br><br><br>4.192%   |  |
| NC       | 2<br>3.188<br>0.443<br>22.222%<br>0.343%<br>0.122%<br>-0.665     | 3<br>3.778<br>0.160<br>33.333%<br>0.434%<br>0.182%<br>-0.400      | 2<br>0.694<br>2.455<br>22.222%<br>1.575%<br>0.122%<br>1.567    | 1<br>0.831<br>0.034<br>11.111%<br>0.658%<br>0.061%<br>0.185   | 1<br>0.509<br>0.475<br>11.111%<br>1.075%<br>0.061%<br>0.689    | 9<br><br><br>0.547%    |  |
| ORTHMUET | 146<br>143.802<br>0.034<br>35.961%<br>25.043%<br>8.870%<br>0.183 | 173<br>170.441<br>0.038<br>42.611%<br>25.036%<br>10.510%<br>0.196 | 28<br>31.326<br>0.353<br>6.897%<br>22.047%<br>1.701%<br>-0.594 | 39<br>37.492<br>0.061<br>9.606%<br>25.658%<br>2.369%<br>0.246 | 20<br>22.939<br>0.377<br>4.926%<br>21.505%<br>1.215%<br>-0.614 | 406<br><br><br>24.666% |  |
| ORTHOA   | 34<br>42.503<br>1.701                                            | 46<br>50.377<br>0.380                                             | 13<br>9.259<br>1.512                                           | 14<br>11.081<br>0.769                                         | 13<br>6.780<br>5.706                                           | 120                    |  |

|             |         |         |         |         |         |         |
|-------------|---------|---------|---------|---------|---------|---------|
|             | 28.333% | 38.333% | 10.833% | 11.667% | 10.833% | 7.290%  |
|             | 5.832%  | 6.657%  | 10.236% | 9.211%  | 13.978% |         |
|             | 2.066%  | 2.795%  | 0.790%  | 0.851%  | 0.790%  |         |
|             | -1.304  | -0.617  | 1.230   | 0.877   | 2.389   |         |
| ORTHSIGNE   | 24      | 45      | 9       | 12      | 11      | 101     |
|             | 35.773  | 42.400  | 7.793   | 9.327   | 5.707   |         |
|             | 3.875   | 0.159   | 0.187   | 0.766   | 4.910   |         |
|             | 23.762% | 44.554% | 8.911%  | 11.881% | 10.891% | 6.136%  |
|             | 4.117%  | 6.512%  | 7.087%  | 7.895%  | 11.828% |         |
|             | 1.458%  | 2.734%  | 0.547%  | 0.729%  | 0.668%  |         |
|             | -1.968  | 0.399   | 0.432   | 0.875   | 2.216   |         |
| ORTHSUB     | 143     | 158     | 37      | 28      | 19      | 385     |
|             | 136.364 | 161.625 | 29.705  | 35.553  | 21.753  |         |
|             | 0.323   | 0.081   | 1.791   | 1.605   | 0.348   |         |
|             | 37.143% | 41.039% | 9.610%  | 7.273%  | 4.935%  | 23.390% |
|             | 24.528% | 22.865% | 29.134% | 18.421% | 20.430% |         |
|             | 8.688%  | 9.599%  | 2.248%  | 1.701%  | 1.154%  |         |
|             | 0.568   | -0.285  | 1.338   | -1.267  | -0.590  |         |
| PHONCLUSTER | 16      | 15      | 3       | 5       | 0       | 39      |
|             | 13.813  | 16.372  | 3.009   | 3.601   | 2.204   |         |
|             | 0.346   | 0.115   | 0.000   | 0.543   | 2.204   |         |
|             | 41.026% | 38.462% | 7.692%  | 12.821% | 0.000%  | 2.369%  |
|             | 2.744%  | 2.171%  | 2.362%  | 3.289%  | 0.000%  |         |
|             | 0.972%  | 0.911%  | 0.182%  | 0.304%  | 0.000%  |         |
|             | 0.588   | -0.339  | -0.005  | 0.737   | -1.484  |         |
| PHONGRAPHCO | 52      | 29      | 1       | 2       | 4       | 88      |
|             | 31.169  | 36.943  | 6.790   | 8.126   | 4.972   |         |
|             | 13.922  | 1.708   | 4.937   | 4.619   | 0.190   |         |
|             | 59.091% | 32.955% | 1.136%  | 2.273%  | 4.545%  | 5.346%  |
|             | 8.919%  | 4.197%  | 0.787%  | 1.316%  | 4.301%  |         |
|             | 3.159%  | 1.762%  | 0.061%  | 0.122%  | 0.243%  |         |
|             | 3.731   | -1.307  | -2.222  | -2.149  | -0.436  |         |
| PHONOAII    | 39      | 47      | 8       | 14      | 4       | 112     |
|             | 39.670  | 47.018  | 8.642   | 10.343  | 6.328   |         |
|             | 0.011   | 0.000   | 0.048   | 1.293   | 0.856   |         |
|             | 34.821% | 41.964% | 7.143%  | 12.500% | 3.571%  | 6.804%  |

|              |         |         |         |        |        |        |
|--------------|---------|---------|---------|--------|--------|--------|
|              | 6.690%  | 6.802%  | 6.299%  | 9.211% | 4.301% |        |
|              | 2.369%  | 2.855%  | 0.486%  | 0.851% | 0.243% |        |
|              | -0.106  | -0.003  | -0.218  | 1.137  | -0.925 |        |
| PHONSUB      | 29      | 49      | 10      | 6      | 1      | 95     |
|              | 33.648  | 39.882  | 7.330   | 8.773  | 5.368  |        |
|              | 0.642   | 2.085   | 0.973   | 0.876  | 3.554  |        |
|              | 30.526% | 51.579% | 10.526% | 6.316% | 1.053% | 5.772% |
|              | 4.974%  | 7.091%  | 7.874%  | 3.947% | 1.075% |        |
|              | 1.762%  | 2.977%  | 0.608%  | 0.365% | 0.061% |        |
|              | -0.801  | 1.444   | 0.986   | -0.936 | -1.885 |        |
| Column Total | 583     | 691     | 127     | 152    | 93     | 1646   |
|              | 35.419% | 41.981% | 7.716%  | 9.235% | 5.650% |        |

Statistics for All Table Factors

Pearson's Chi-squared test  
 Chi<sup>2</sup> = 120.0524      d.f. = 52      p = 2.659098e-07
