# Supplementary material
Source: publisher figshare collection journal article supplement (https://asha.figshare.com/articles/dataset/_/20520774)
Supplement: Supplementary file 4 [file 1]

**Supplemental Material S2. POMAS-FR coding scheme.**

| Error type - POM                                                                                                | Error type - fine grain | Definition                                                                                                                                             | Exemplar misspelling (from text / dictation)  | Target spelling (from text / dictation)          |
|-----------------------------------------------------------------------------------------------------------------|-------------------------|--------------------------------------------------------------------------------------------------------------------------------------------------------|-----------------------------------------------|--------------------------------------------------|
| Phonological = errors where the participant did not represent the phonological structure of the word            | PHONOA                  | Phoneme omission, addition or inversion                                                                                                                | voi / tuli<br>léa / plarfond<br>avce / tupile | voir / tulipe<br>la / plafond<br>avec / tulipe   |
|                                                                                                                 | PHONCLUSTER             | Error on a consonant cluster (reduction, substitution, or cluster 'syllabification')                                                                   | pasque / doite<br>prort / apsepte<br>tableau  | parce que / droite<br>sport / apsepte<br>tableau |
|                                                                                                                 | PHONGRAPHCO             | Error affecting phonology on a: complex grapheme (e.g. ill, eil, eill, ail, aill, ay, oi, oin, ien, eu, oe) or contextual grapheme (e.g. g/gu, s/ss/c) | portallei / man                               | portail / main                                   |
|                                                                                                                 | PHONSUB                 | Substitution by a grapheme that cannot represent the chosen phoneme, in any context                                                                    | desus / augourd'hui<br>piti / soustache       | dessus / aujourd'hui<br>petit / moustache        |
| Orthographic = errors where the participant did not represent relevant orthographic knowledge in their spelling | ORTHEXCPT               | Error with idiosyncratic spelling patterns, common in words borrowed from other spelling systems                                                       | fesait<br>tramwet<br>foute<br>ten<br>doi      | faisait<br>tramway<br>foot<br>temps<br>doigt     |
|                                                                                                                 | ORTHOA                  | Grapheme omission or addition (typically on double consonants)                                                                                         | ponney / commencement<br>bagaré / ill         | poney / commencement<br>bagarré / il             |
|                                                                                                                 | ORTHSUB                 | Grapheme substitution by another legal grapheme for the target phoneme                                                                                 | plastic / min                                 | plastique / main                                 |

| Error type - POM                                                                                                 | Error type - fine grain | Definition                                                                                                                     | Exemplar misspelling (from text / dictation)                                         | Target spelling (from text / dictation)                                                |
|------------------------------------------------------------------------------------------------------------------|-------------------------|--------------------------------------------------------------------------------------------------------------------------------|--------------------------------------------------------------------------------------|----------------------------------------------------------------------------------------|
|                                                                                                                  | ORTHMUET                | Error on a silent grapheme (addition, substitution, omission of silent letter in any word position - typically in word ending) | toujour / plafon<br>encors / plafont<br>le filme / mere<br>matématiques / aujourd'ui | toujours / plafond<br>encore / plafond<br>le film / mer<br>mathématiques / aujourd'hui |
|                                                                                                                  | ORTHSIGNE               | Error on an accent, cedilla or hyphen                                                                                          | â / designe<br>commençait<br>parce-que                                               | à / désigne<br>commençait<br>parce que                                                 |
| Morphological = error where the participant did not represent relevant morphological knowledge in their spelling | MORCOART                | Error related to word boundaries: segmentation<br>liaison<br>contraction                                                       | jenepeuxpas / au jourd'hui<br>mon nanniversaire<br>jai / aujourd'hui                 | je ne peux pas / aujourd'hui<br>mon anniversaire<br>j'ai / aujourd'hui                 |
|                                                                                                                  | MORDER<br>MORACCORD     | Error on a derivational morpheme<br>Error with non-verbal agreement - number and/or gender marking in noun phrases             | déguiseman / commenceman<br>mes copine / ils<br>ma matière préféré / droit           | déguisement / commencement<br>mes copines / il<br>ma matière préférée / droite         |
|                                                                                                                  | MORVERB                 | Error with verbal agreement (including with past participle) - tense, person or gender/number marking in verb phrases          | j'étais / sui<br>je suis tomber                                                      | j'étais / suis<br>je suis tombé                                                        |
|                                                                                                                  | MORHOM                  | Homophone substitution                                                                                                         | sa sonnait / mère<br>ont a fait / les                                                | ça sonnait / mer<br>on a fait / lait                                                   |
